# Supplementary material
Source: PubMed Central journal article supplement (PMC4720649)
Supplement: 11606_2015_3467_MOESM1_ESM.pdf [file 11606_2015_3467_MOESM1_ESM.pdf]

| <b>Supplemental Table 1. Correlation Matrix between Attributes of Available MAPD Plans</b> |             |                          |                           |               |                 |                  |                 |                 |                   |                   |
|--------------------------------------------------------------------------------------------|-------------|--------------------------|---------------------------|---------------|-----------------|------------------|-----------------|-----------------|-------------------|-------------------|
|                                                                                            | Star Rating | Combined Premiums & OOPC | Sponsor Org. Market Share | Coverage type | Dental Coverage | Hearing Coverage | Vision Coverage | Rx Gap Coverage | Part D Deductible | Part C Deductible |
| Star Rating                                                                                | 1.00        |                          |                           |               |                 |                  |                 |                 |                   |                   |
| Combined Premiums & OOPC                                                                   | -0.01       | 1.00                     |                           |               |                 |                  |                 |                 |                   |                   |
| Sponsor Org. Market Share                                                                  | 0.21*       | 0.18*                    | 1.00                      |               |                 |                  |                 |                 |                   |                   |
| Coverage type                                                                              | 0.26*       | -0.37*                   | -0.05                     | 1.00          |                 |                  |                 |                 |                   |                   |
| Dental Coverage                                                                            | -0.13*      | -0.07                    | -0.09                     | 0.06          | 1.00            |                  |                 |                 |                   |                   |
| Hearing Coverage                                                                           | 0.24*       | -0.09                    | -0.06                     | 0.19*         | 0.03            | 1.00             |                 |                 |                   |                   |
| Vision Coverage                                                                            | 0.08        | -0.05                    | -0.04                     | 0.09          | 0.31*           | 0.34*            | 1.00            |                 |                   |                   |
| Rx Gap Coverage                                                                            | -0.04       | -0.20*                   | 0.08                      | 0.07          | 0.25*           | -0.18*           | 0.10*           | 1.00            |                   |                   |
| Part D Deductible                                                                          | -0.14*      | 0.29*                    | -0.07                     | -0.17*        | -0.10*          | 0.03             | -0.08           | -0.33*          | 1.00              |                   |
| Part C Deductible                                                                          | 0.004       | 0.10*                    | -0.02                     | -0.14*        | 0.06            | -0.08            | 0.01            | -0.17*          | 0.22*             | 1.00              |
