# Supplementary material
Source: PubMed Central journal article supplement (PMC4720649)
Supplement: 11606_2015_3467_MOESM2_ESM.pdf [file 11606_2015_3467_MOESM2_ESM.pdf]

**Supplemental Table 2.** Beneficiaries' Estimated Willingness to Pay and Marginal Willingness to Pay in Annual Combined Health and Drug Plan *Premiums Only* for Star Ratings.

| Star Rating                   | Willingness to Pay<br><i>Mean</i> | Marginal Willingness to Pay<br><i>Mean</i> | Marginal Willingness to Pay<br><i>(95% CI)</i> |
|-------------------------------|-----------------------------------|--------------------------------------------|------------------------------------------------|
| Unrated Plan                  | \$1,883.63                        |                                            |                                                |
| From Unrated to 2.5-Star Plan |                                   | -\$282.49                                  | (-\$292.20, -\$272.78)                         |
| 2.5-Star Plan                 | \$1,601.14                        |                                            |                                                |
| From 2.5-Star to 3-Star Plan  |                                   | \$580.29                                   | (\$572.42, \$588.15)                           |
| 3-Star Plan                   | \$2,181.43                        |                                            |                                                |
| From 3-Star to 3.5-Star Plan  |                                   | \$431.19                                   | (\$426.24, \$436.13)                           |
| 3.5-Star Plan                 | \$2,612.61                        |                                            |                                                |
| From 3.5-Star to 4-Star Plan  |                                   | \$282.09                                   | (\$279.16, \$285.01)                           |
| 4-Star Plan                   | \$2,894.70                        |                                            |                                                |
| From 4-Star to 4.5-Star Plan  |                                   | \$132.99                                   | (\$129.23, \$136.74)                           |
| 4.5-Star Plan                 | \$3,027.69                        |                                            |                                                |
| From 4.5-Star to 5-Star Plan  |                                   | -\$16.11                                   | (-\$22.52, -\$9.70)                            |
| 5-Star Plan                   | \$3,011.57                        |                                            |                                                |
