# Supplementary material
Source: PubMed Central journal article supplement (PMC4720649)
Supplement: 11606_2015_3467_MOESM3_ESM.pdf [file 11606_2015_3467_MOESM3_ESM.pdf]

**Supplemental Table 3.** Beneficiaries Age 64 and Older: Estimated Willingness to Pay in Annual Combined Health and Drug Plan Premiums and Out-of-Pocket Costs for Star Ratings

| Star Rating                   | Willingness to Pay<br><i>Mean</i> | Marginal Willingness to Pay<br><i>Mean</i> | <i>(95% CI)</i>        |
|-------------------------------|-----------------------------------|--------------------------------------------|------------------------|
| Unrated Plan                  | \$4,495.30                        |                                            |                        |
| From Unrated to 2.5-Star Plan |                                   | -\$381.32                                  | (-\$392.62, -\$370.02) |
| 2.5-Star Plan                 | \$4,146.89                        |                                            |                        |
| From 2.5-Star to 3-Star Plan  |                                   | \$567.76                                   | (\$558.67, \$576.84)   |
| 3-Star Plan                   | \$4,696.14                        |                                            |                        |
| From 3-Star to 3.5-Star Plan  |                                   | \$448.53                                   | (\$442.81, \$454.24)   |
| 3.5-Star Plan                 | \$5,125.16                        |                                            |                        |
| From 3.5-Star to 4-Star Plan  |                                   | \$329.30                                   | (\$325.92, \$332.68)   |
| 4-Star Plan                   | \$5,433.91                        |                                            |                        |
| From 4-Star to 4.5-Star Plan  |                                   | \$210.07                                   | (\$205.75, \$214.39)   |
| 4.5-Star Plan                 | \$5,622.39                        |                                            |                        |
| From 4.5-Star to 5-Star Plan  |                                   | \$90.84                                    | (\$83.46, \$98.23)     |
| 5-Star Plan                   | \$5,690.62                        |                                            |                        |
