# Supplementary material
Source: PubMed Central journal article supplement (PMC4720649)
Supplement: 11606_2015_3467_MOESM4_ESM.pdf [file 11606_2015_3467_MOESM4_ESM.pdf]

| <b>Supplemental Table 4.</b> Beneficiaries' Estimated Willingness to Pay and Marginal Willingness to Pay in Annual Combined Health and Drug Plan Premiums and Out-of-Pocket Costs for Star Ratings– <i>Non-Parametric</i> |                                   |                                                     |                        |
|---------------------------------------------------------------------------------------------------------------------------------------------------------------------------------------------------------------------------|-----------------------------------|-----------------------------------------------------|------------------------|
| Star Rating                                                                                                                                                                                                               | Willingness to Pay<br><i>Mean</i> | Marginal Willingness to Pay<br><i>Mean (95% CI)</i> |                        |
| Unrated Plan                                                                                                                                                                                                              | \$4,503.34                        |                                                     |                        |
| From Unrated to 2.5-Star Plan                                                                                                                                                                                             |                                   | -\$645.82                                           | (-\$658.53, -\$633.11) |
| 2.5-Star Plan                                                                                                                                                                                                             | \$3,857.52                        |                                                     |                        |
| From 2.5-Star to 3-Star Plan                                                                                                                                                                                              |                                   | \$877.79                                            | (\$866.69, \$888.89)   |
| 3-Star Plan                                                                                                                                                                                                               | \$4,735.30                        |                                                     |                        |
| From 3-Star to 3.5-Star Plan                                                                                                                                                                                              |                                   | \$89.41                                             | (\$82.34, \$96.47)     |
| 3.5-Star Plan                                                                                                                                                                                                             | \$4,824.71                        |                                                     |                        |
| From 3.5-Star to 4-Star Plan                                                                                                                                                                                              |                                   | \$193.40                                            | (\$182.05, \$204.75)   |
| 4-Star Plan                                                                                                                                                                                                               | \$5,018.11                        |                                                     |                        |
| From 4-Star to 4.5-Star Plan                                                                                                                                                                                              |                                   | \$445.85                                            | (\$432.99, \$458.71)   |
| 4.5-Star Plan                                                                                                                                                                                                             | \$5,463.96                        |                                                     |                        |
| From 4.5-Star to 5-Star Plan                                                                                                                                                                                              |                                   | -\$306.59                                           | (-\$340.11, -\$273.07) |
| 5-Star Plan                                                                                                                                                                                                               | \$5,157.37                        |                                                     |                        |
