# Supplementary material
Source: PubMed Central journal article supplement (PMC4720649)
Supplement: 11606_2015_3467_MOESM5_ESM.pdf [file 11606_2015_3467_MOESM5_ESM.pdf]

**Supplemental Table 5.** Beneficiaries' Estimated Willingness to Pay in Annual Combined Health and Drug Plan Premiums and Out-of-Pocket Costs for Star Ratings – *for HMO Medicare Advantage Plans.*

| Star Rating                   | Willingness to Pay<br><i>Mean</i> | Marginal Willingness to Pay<br><i>Mean</i> | <i>(95% CI)</i>        |
|-------------------------------|-----------------------------------|--------------------------------------------|------------------------|
| Unrated Plan                  | \$4,503.34                        |                                            |                        |
| From Unrated to 2.5-Star Plan |                                   | -\$275.52                                  | (-\$294.34, -\$256.71) |
| 2.5-Star Plan                 | \$4,227.81                        |                                            |                        |
| From 2.5-Star to 3-Star Plan  |                                   | \$446.67                                   | (\$438.18, \$455.15)   |
| 3-Star Plan                   | \$4,674.48                        |                                            |                        |
| From 3-Star to 3.5-Star Plan  |                                   | \$393.51                                   | (\$387.97, \$399.04)   |
| 3.5-Star Plan                 | \$5,067.99                        |                                            |                        |
| From 3.5-Star to 4-Star Plan  |                                   | \$340.34                                   | (\$336.58, \$344.10)   |
| 4-Star Plan                   | \$5,408.33                        |                                            |                        |
| From 4-Star to 4.5-Star Plan  |                                   | \$287.18                                   | (\$282.45, \$291.91)   |
| 4.5-Star Plan                 | \$5,695.51                        |                                            |                        |
| From 4.5-Star to 5-Star Plan  |                                   | \$234.02                                   | (\$226.57, \$241.46)   |
| 5-Star Plan                   | \$5,929.53                        |                                            |                        |
