# Supplementary material
Source: PubMed Central journal article supplement (PMC4720649)
Supplement: 11606_2015_3467_MOESM6_ESM.pdf [file 11606_2015_3467_MOESM6_ESM.pdf]

| <b>Supplemental Table 6a.</b> Beneficiaries' Estimated Willingness to Pay and Marginal Willingness to Pay in Annual Combined Health and Drug Plan Premiums and Out-of-Pocket Costs for Star Ratings: by Beneficiary Characteristics ( <i>underlying data for Figure 2</i> ) |                                   |                                            |                                   |                                            |                                   |                                            |                                   |                                            |
|-----------------------------------------------------------------------------------------------------------------------------------------------------------------------------------------------------------------------------------------------------------------------------|-----------------------------------|--------------------------------------------|-----------------------------------|--------------------------------------------|-----------------------------------|--------------------------------------------|-----------------------------------|--------------------------------------------|
| 5-Star Quality Rating                                                                                                                                                                                                                                                       | Willingness to Pay<br><i>Mean</i> | Marginal Willingness to Pay<br><i>Mean</i> | Willingness to Pay<br><i>Mean</i> | Marginal Willingness to Pay<br><i>Mean</i> | Willingness to Pay<br><i>Mean</i> | Marginal Willingness to Pay<br><i>Mean</i> | Willingness to Pay<br><i>Mean</i> | Marginal Willingness to Pay<br><i>Mean</i> |
| <b>By Age</b>                                                                                                                                                                                                                                                               | <b>Less than 64 yr</b>            |                                            | <b>64-65 yr</b>                   |                                            | <b>66-70 yr</b>                   |                                            | <b>71 or greater yr</b>           |                                            |
| Unrated Plan                                                                                                                                                                                                                                                                | \$4,503.34                        |                                            | \$4,503.34                        |                                            | \$4,503.34                        |                                            | \$4,503.34                        |                                            |
| From Unrated to 2.5-Star                                                                                                                                                                                                                                                    |                                   | -\$312.95                                  |                                   | -\$365.34                                  |                                   | -\$310.62                                  |                                   | -\$387.95                                  |
| 2.5-Star Plan                                                                                                                                                                                                                                                               | \$4,190.39                        |                                            | \$4,138.00                        |                                            | \$4,192.72                        |                                            | \$4,115.39                        |                                            |
| From 2.5-Star to 3-Star                                                                                                                                                                                                                                                     |                                   | \$495.99                                   |                                   | \$573.22                                   |                                   | \$542.75                                   |                                   | \$623.82                                   |
| 3-Star Plan                                                                                                                                                                                                                                                                 | \$4,686.38                        |                                            | \$4,711.22                        |                                            | \$4,735.47                        |                                            | \$4,739.22                        |                                            |
| From 3-Star to 3.5-Star                                                                                                                                                                                                                                                     |                                   | \$334.97                                   |                                   | \$484.80                                   |                                   | \$415.39                                   |                                   | \$424.93                                   |
| 3.5-Star Plan                                                                                                                                                                                                                                                               | \$5,021.35                        |                                            | \$5,196.02                        |                                            | \$5,150.86                        |                                            | \$5,164.15                        |                                            |
| From 3.5-Star to 4-Star                                                                                                                                                                                                                                                     |                                   | \$173.96                                   |                                   | \$396.38                                   |                                   | \$288.04                                   |                                   | \$226.04                                   |
| 4-Star Plan                                                                                                                                                                                                                                                                 | \$5,195.31                        |                                            | \$5,592.40                        |                                            | \$5,438.90                        |                                            | \$5,390.19                        |                                            |
| From 4-Star to 4.5-Star                                                                                                                                                                                                                                                     |                                   | \$12.94                                    |                                   | \$307.96                                   |                                   | \$160.68                                   |                                   | \$27.15                                    |
| 4.5-Star Plan                                                                                                                                                                                                                                                               | \$5,208.25                        |                                            | \$5,900.36                        |                                            | \$5,599.59                        |                                            | \$5,417.33                        |                                            |
| From 4.5-Star to 5-Star                                                                                                                                                                                                                                                     |                                   | -\$148.08                                  |                                   | \$219.54                                   |                                   | \$33.33                                    |                                   | -\$171.75                                  |
| 5-Star Plan                                                                                                                                                                                                                                                                 | \$5,060.17                        |                                            | \$6,119.90                        |                                            | \$5,632.92                        |                                            | \$5,245.59                        |                                            |
| <b>By Sex</b>                                                                                                                                                                                                                                                               | <b>Female</b>                     |                                            |                                   | <b>Male</b>                                |                                   |                                            |                                   |                                            |
| Unrated Plan                                                                                                                                                                                                                                                                | \$4,503.34                        |                                            | \$4,503.34                        |                                            |                                   |                                            |                                   |                                            |
| From Unrated to 2.5-Star                                                                                                                                                                                                                                                    |                                   | -\$367.77                                  |                                   | -\$327.62                                  |                                   |                                            |                                   |                                            |
| 2.5-Star Plan                                                                                                                                                                                                                                                               | \$4,135.57                        |                                            | \$4,175.72                        |                                            |                                   |                                            |                                   |                                            |
| From 2.5-Star to 3-Star                                                                                                                                                                                                                                                     |                                   | \$583.97                                   |                                   | \$511.22                                   |                                   |                                            |                                   |                                            |
| 3-Star Plan                                                                                                                                                                                                                                                                 | \$4,719.53                        |                                            | \$4,686.94                        |                                            |                                   |                                            |                                   |                                            |
| From 3-Star to 3.5-Star                                                                                                                                                                                                                                                     |                                   | \$453.15                                   |                                   | \$402.52                                   |                                   |                                            |                                   |                                            |
| 3.5-Star Plan                                                                                                                                                                                                                                                               | \$5,172.69                        |                                            | \$5,089.46                        |                                            |                                   |                                            |                                   |                                            |
| From 3.5-Star to 4-Star                                                                                                                                                                                                                                                     |                                   | \$322.34                                   |                                   | \$293.83                                   |                                   |                                            |                                   |                                            |
| 4-Star Plan                                                                                                                                                                                                                                                                 | \$5,495.03                        |                                            | \$5,383.29                        |                                            |                                   |                                            |                                   |                                            |
| From 4-Star to 4.5-Star                                                                                                                                                                                                                                                     |                                   | \$191.53                                   |                                   | \$185.14                                   |                                   |                                            |                                   |                                            |
| 4.5-Star Plan                                                                                                                                                                                                                                                               | \$5,686.56                        |                                            | \$5,568.43                        |                                            |                                   |                                            |                                   |                                            |
| From 4.5-Star to 5-Star                                                                                                                                                                                                                                                     |                                   | \$60.72                                    |                                   | \$76.44                                    |                                   |                                            |                                   |                                            |
| 5-Star Plan                                                                                                                                                                                                                                                                 | \$5,747.27                        |                                            | \$5,644.87                        |                                            |                                   |                                            |                                   |                                            |

| <b>Supplemental Table 6b.</b> Beneficiaries' Estimated Willingness to Pay and Marginal Willingness to Pay in Annual Combined Health and Drug Plan Premiums and Out-of-Pocket Costs for Star Ratings: by Beneficiary Characteristics ( <i>underlying data for Figure 2</i> ) |                                   |                                            |                                   |                                            |                                   |                                            |                                   |                                            |
|-----------------------------------------------------------------------------------------------------------------------------------------------------------------------------------------------------------------------------------------------------------------------------|-----------------------------------|--------------------------------------------|-----------------------------------|--------------------------------------------|-----------------------------------|--------------------------------------------|-----------------------------------|--------------------------------------------|
| 5-Star Quality Rating                                                                                                                                                                                                                                                       | Willingness to Pay<br><i>Mean</i> | Marginal Willingness to Pay<br><i>Mean</i> | Willingness to Pay<br><i>Mean</i> | Marginal Willingness to Pay<br><i>Mean</i> | Willingness to Pay<br><i>Mean</i> | Marginal Willingness to Pay<br><i>Mean</i> | Willingness to Pay<br><i>Mean</i> | Marginal Willingness to Pay<br><i>Mean</i> |
| <b>By Race/Ethnicity</b>                                                                                                                                                                                                                                                    | <b>White</b>                      |                                            | <b>Black</b>                      |                                            | <b>Hispanic</b>                   |                                            | <b>Other</b>                      |                                            |
| Unrated Plan                                                                                                                                                                                                                                                                | \$4,503.34                        |                                            | \$4,503.34                        |                                            | \$4,503.34                        |                                            | \$4,503.34                        |                                            |
| From Unrated to 2.5-Star                                                                                                                                                                                                                                                    |                                   | -\$519.38                                  |                                   | \$13.74                                    |                                   | \$87.14                                    |                                   | \$19.32                                    |
| 2.5-Star Plan                                                                                                                                                                                                                                                               | \$3,983.96                        |                                            | \$4,517.07                        |                                            | \$4,590.48                        |                                            | \$4,522.65                        |                                            |
| From 2.5-Star to 3-Star                                                                                                                                                                                                                                                     |                                   | \$706.09                                   |                                   | \$326.86                                   |                                   | \$285.98                                   |                                   | \$49.22                                    |
| 3-Star Plan                                                                                                                                                                                                                                                                 | \$4,690.05                        |                                            | \$4,843.93                        |                                            | \$4,876.46                        |                                            | \$4,571.87                        |                                            |
| From 3-Star to 3.5-Star                                                                                                                                                                                                                                                     |                                   | \$530.15                                   |                                   | \$215.95                                   |                                   | \$313.54                                   |                                   | \$152.93                                   |
| 3.5-Star Plan                                                                                                                                                                                                                                                               | \$5,220.19                        |                                            | \$5,059.88                        |                                            | \$5,190.00                        |                                            | \$4,724.80                        |                                            |
| From 3.5-Star to 4-Star                                                                                                                                                                                                                                                     |                                   | \$354.21                                   |                                   | \$105.04                                   |                                   | \$341.10                                   |                                   | \$256.63                                   |
| 4-Star Plan                                                                                                                                                                                                                                                                 | \$5,574.40                        |                                            | \$5,164.92                        |                                            | \$5,531.11                        |                                            | \$4,981.43                        |                                            |
| From 4-Star to 4.5-Star                                                                                                                                                                                                                                                     |                                   | \$178.26                                   |                                   | -\$5.87                                    |                                   | \$368.66                                   |                                   | \$360.34                                   |
| 4.5-Star Plan                                                                                                                                                                                                                                                               | \$5,752.66                        |                                            | \$5,159.05                        |                                            | \$5,899.77                        |                                            | \$5,341.77                        |                                            |
| From 4.5-Star to 5-Star                                                                                                                                                                                                                                                     |                                   | \$2.32                                     |                                   | -\$116.78                                  |                                   | \$396.22                                   |                                   | \$464.05                                   |
| 5-Star Plan                                                                                                                                                                                                                                                                 | \$5,754.99                        |                                            | \$5,042.28                        |                                            | \$6,295.99                        |                                            | \$5,805.83                        |                                            |
| <b>By Urban vs. Rural</b>                                                                                                                                                                                                                                                   | <b>Rural</b>                      |                                            | <b>Urban</b>                      |                                            |                                   |                                            |                                   |                                            |
| Unrated Plan                                                                                                                                                                                                                                                                | \$4,503.34                        |                                            | \$4,503.34                        |                                            |                                   |                                            |                                   |                                            |
| From Unrated to 2.5-Star                                                                                                                                                                                                                                                    |                                   | -\$714.64                                  |                                   | -\$261.60                                  |                                   |                                            |                                   |                                            |
| 2.5-Star Plan                                                                                                                                                                                                                                                               | \$3,788.70                        |                                            | \$4,241.74                        |                                            |                                   |                                            |                                   |                                            |
| From 2.5-Star to 3-Star                                                                                                                                                                                                                                                     |                                   | \$527.79                                   |                                   | \$533.26                                   |                                   |                                            |                                   |                                            |
| 3-Star Plan                                                                                                                                                                                                                                                                 | \$4,316.50                        |                                            | \$4,784.01                        |                                            |                                   |                                            |                                   |                                            |
| From 3-Star to 3.5-Star                                                                                                                                                                                                                                                     |                                   | \$374.72                                   |                                   | \$435.07                                   |                                   |                                            |                                   |                                            |
| 3.5-Star Plan                                                                                                                                                                                                                                                               | \$4,691.22                        |                                            | \$5,219.08                        |                                            |                                   |                                            |                                   |                                            |
| From 3.5-Star to 4-Star                                                                                                                                                                                                                                                     |                                   | \$221.66                                   |                                   | \$327.86                                   |                                   |                                            |                                   |                                            |
| 4-Star Plan                                                                                                                                                                                                                                                                 | \$4,912.88                        |                                            | \$5,546.95                        |                                            |                                   |                                            |                                   |                                            |
| From 4-Star to 4.5-Star                                                                                                                                                                                                                                                     |                                   | \$68.59                                    |                                   | \$220.66                                   |                                   |                                            |                                   |                                            |
| 4.5-Star Plan                                                                                                                                                                                                                                                               | \$4,981.46                        |                                            | \$5,767.61                        |                                            |                                   |                                            |                                   |                                            |
| From 4.5-Star to 5-Star                                                                                                                                                                                                                                                     |                                   | -\$84.48                                   |                                   | \$113.45                                   |                                   |                                            |                                   |                                            |
| 5-Star Plan                                                                                                                                                                                                                                                                 | \$4,896.98                        |                                            | \$5,881.06                        |                                            |                                   |                                            |                                   |                                            |
