# Supplementary material
Source: PubMed Central journal article supplement (PMC4720649)
Supplement: 11606_2015_3467_MOESM7_ESM.pdf [file 11606_2015_3467_MOESM7_ESM.pdf]

| <b>Supplemental Table 7. Coefficients for Main Conditional Logistic Regression Model (i.e., Table 3 in Main Paper)</b> |                    |                  |          |               |                  |
|------------------------------------------------------------------------------------------------------------------------|--------------------|------------------|----------|---------------|------------------|
|                                                                                                                        | <b>Coefficient</b> | <b>Std. Err.</b> | <b>z</b> | <b>P&gt;z</b> | <b>(95% CI)</b>  |
| Star-Rating                                                                                                            | 2.6232             | 0.028            | 94.98    | 0.000         | (2.569, 2.677)   |
| Star-Rating^2                                                                                                          | -0.2742            | 0.004            | -71.22   | 0.000         | (-0.282, -0.267) |
| Rated Plan Yes/No                                                                                                      | -1.1604            | 0.010            | -113.31  | 0.000         | (-1.180, -1.140) |
| Combined Annual Premiums and Estimated OOPC in \$                                                                      | -0.0011            | 0.000            | -416.89  | 0.000         | (-0.001, -0.001) |
| Add'l 1% of Sponsoring-Organization Market Share                                                                       | 0.0353             | 0.000            | 454.71   | 0.000         | (0.035, 0.035)   |
| <b>Plan Coverage Type</b>                                                                                              |                    |                  |          |               |                  |
| HMO                                                                                                                    | ref                | -                | -        | -             | -                |
| HMO-POS                                                                                                                | 0.4751             | 0.004            | 116.32   | 0.000         | (0.467, 0.483)   |
| Local PPO                                                                                                              | 0.6189             | 0.004            | 154.85   | 0.000         | (0.611, 0.627)   |
| Private FFS                                                                                                            | -0.3947            | 0.008            | -48.55   | 0.000         | (-0.411, -0.379) |
| Regional PPO                                                                                                           | 1.1440             | 0.005            | 218.27   | 0.000         | (1.134, 1.154)   |
| Offers Dental Coverage                                                                                                 | -0.2286            | 0.003            | -75.47   | 0.000         | (-0.234, -0.223) |
| Offers Hearing Coverage                                                                                                | 0.0001             | 0.003            | 0.03     | 0.975         | (-0.007, 0.007)  |
| Offers Vision Coverage                                                                                                 | 0.2749             | 0.005            | 58.44    | 0.000         | (0.266, 0.284)   |
| Offers Prescription Gap Coverage                                                                                       | 0.0287             | 0.003            | 8.54     | 0.000         | (0.022, 0.035)   |
| Has a Part D Deductible                                                                                                | -0.6270            | 0.006            | -111.30  | 0.000         | (-0.638, -0.616) |
| Has a Part C Deductible                                                                                                | -0.4710            | 0.007            | -71.02   | 0.000         | (-0.484, -0.458) |
| <b>Primary Care Visits Coinsurance</b>                                                                                 |                    |                  |          |               |                  |
| Copayment:\$0.01-\$5.00                                                                                                | ref                | -                | -        | -             | -                |
| Copayment: \$5.01-\$10.00                                                                                              | -0.1024            | 0.005            | -20.14   | 0.000         | (-0.112, -0.092) |
| Copayment: \$10.01-\$15.00                                                                                             | -0.1388            | 0.005            | -25.42   | 0.000         | (-0.150, -0.128) |
| Copayment: >\$15.00 or any Coinsurance                                                                                 | -0.3950            | 0.006            | -64.64   | 0.000         | (-0.407, -0.383) |
| No copayment or Coinsurance                                                                                            | -0.7274            | 0.006            | -126.43  | 0.000         | (-0.739, -0.716) |
| <b>Specialist Visits Coinsurance</b>                                                                                   |                    |                  |          |               |                  |
| Copayment: \$0.01-\$20.00                                                                                              | ref                | -                | -        | -             | -                |
| Copayment: \$20.01-\$30.00                                                                                             | 0.2438             | 0.004            | 56.34    | 0.000         | (0.235, 0.252)   |
| Copayment: \$30.01-\$35.00                                                                                             | 0.0882             | 0.005            | 17.16    | 0.000         | (0.078, 0.098)   |
| Copayment: >\$35.00 or any coinsurance                                                                                 | 0.0195             | 0.006            | 3.35     | 0.001         | (0.008, 0.031)   |
| No copayment or Coinsurance                                                                                            | 0.2002             | 0.008            | 23.74    | 0.000         | (0.184, 0.217)   |
| <b>Outpatient Services Coinsurance</b>                                                                                 |                    |                  |          |               |                  |
| Copayment: \$0.01-\$100.00                                                                                             | ref                | -                | -        | -             | -                |
| Copayment: \$100.01-\$150.00                                                                                           | -0.0941            | 0.005            | -17.66   | 0.000         | (-0.104, -0.084) |
| Copayment: \$150.01-\$200.00                                                                                           | 0.2537             | 0.005            | 48.70    | 0.000         | (0.243, 0.264)   |
| Copayment: : >\$200.00                                                                                                 | 0.3188             | 0.006            | 55.59    | 0.000         | (0.308, 0.330)   |
| Copay or Coinsurance                                                                                                   | 0.3555             | 0.006            | 63.65    | 0.000         | (0.345, 0.366)   |
| Coinsurance only                                                                                                       | 0.7405             | 0.006            | 132.15   | 0.000         | (0.729, 0.751)   |
| No copayment or coinsurance                                                                                            | 0.3621             | 0.007            | 51.60    | 0.000         | (0.348, 0.376)   |
