# Supplementary material
Source: PubMed Central journal article supplement (PMC4720649)

**Supplemental Figure 1.** Willingness to Pay in Annual Combined Health and Drug Plan *Premiums Only* for Star Ratings by Age, Sex, Race, and Urban vs. Rural Residence.

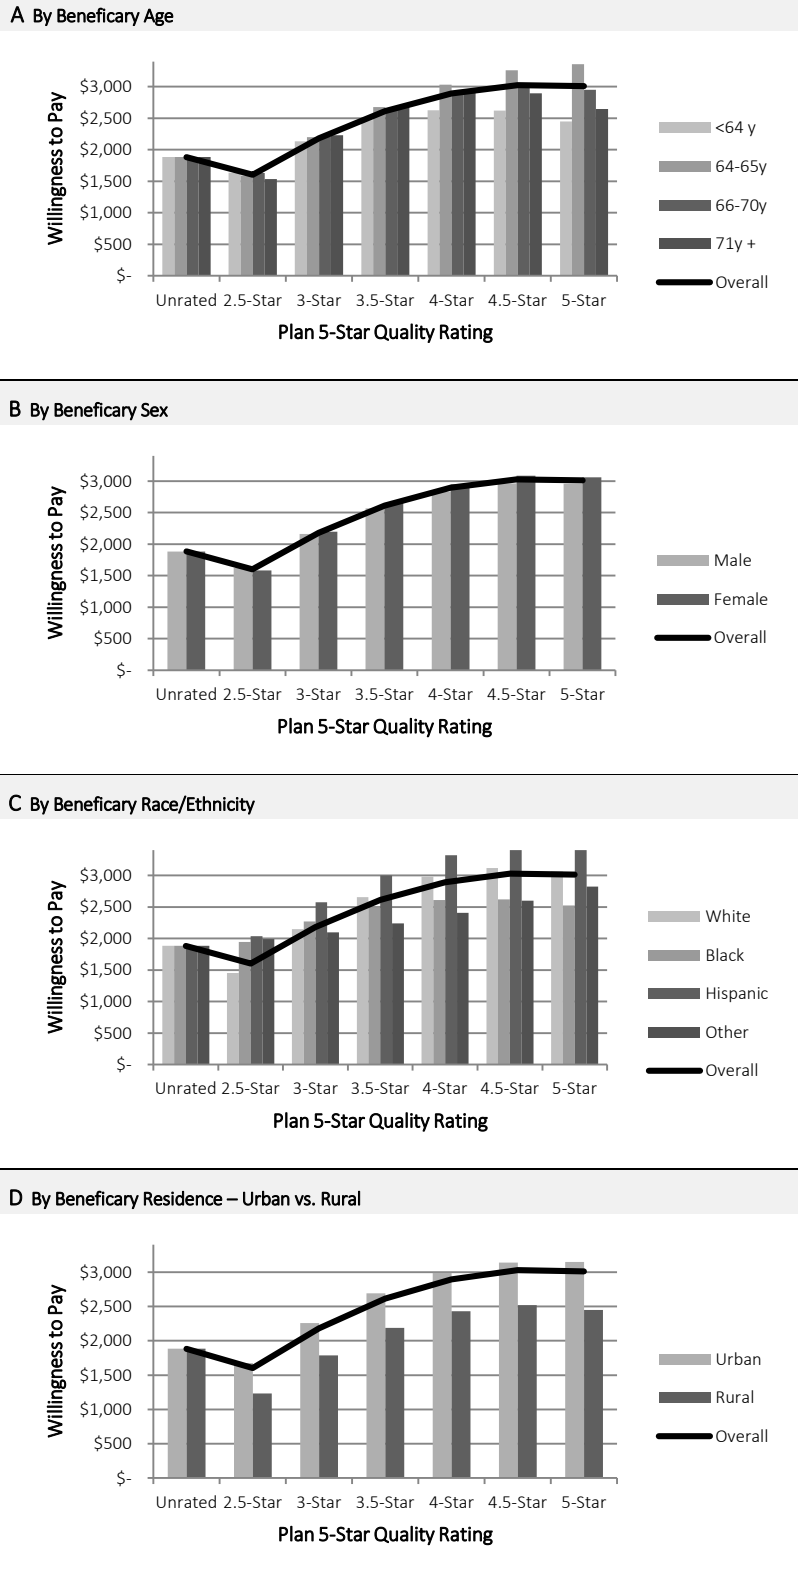

Supplement: 11606_2015_3467_MOESM8_ESM.pdf [file 11606_2015_3467_MOESM8_ESM.pdf]
